# Supplementary material
Source: ML conference proceedings conference paper supplement (https://openreview.net/forum?id=wg3rBImn3O)
Supplement: supplementary_material [file attachment]

Synthetic ( $n = 10$ )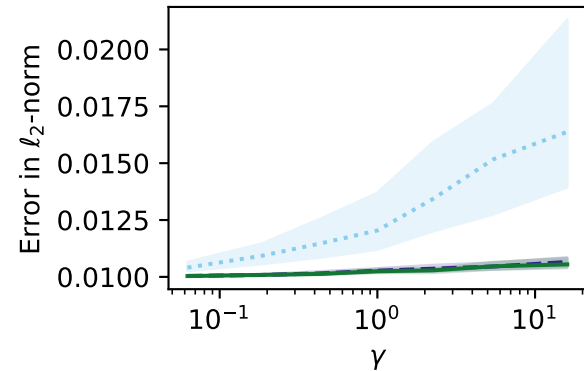Synthetic ( $n = 12$ )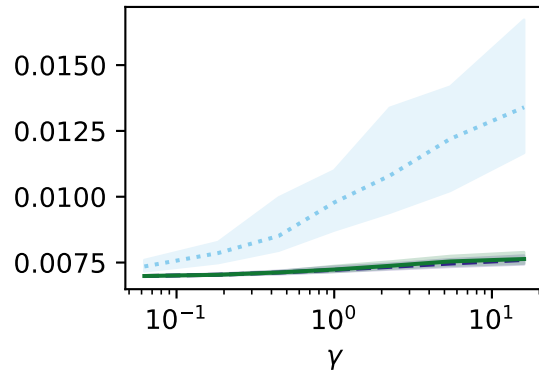Synthetic ( $n = 14$ )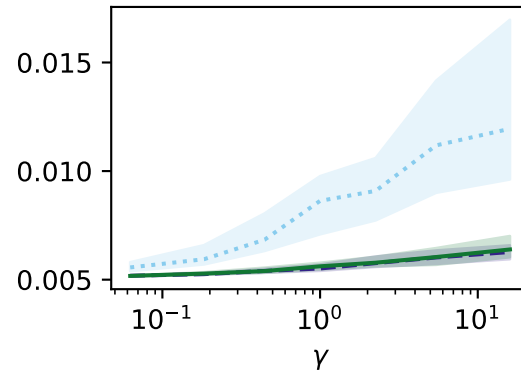Synthetic ( $n = 16$ )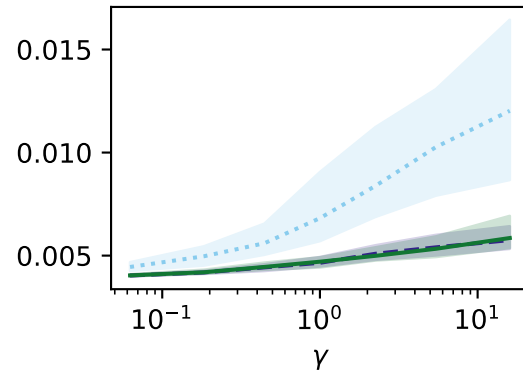

..... Kernel SHAP      - - - Optimized Kernel SHAP      — Leverage SHAP
