# Supplementary material
Source: ML conference proceedings conference paper supplement (https://openreview.net/forum?id=wg3rBImn3O)
Supplement: supplementary_material [file attachment]

Synthetic ( $n = 10$ )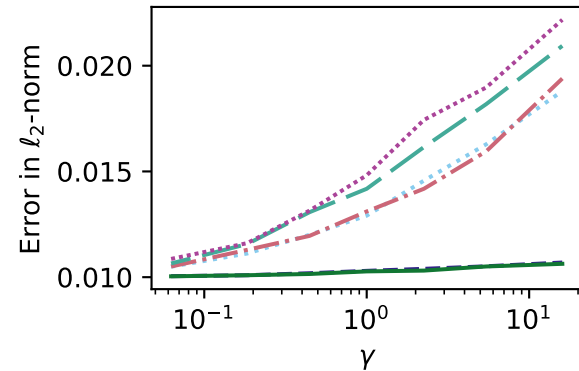Synthetic ( $n = 12$ )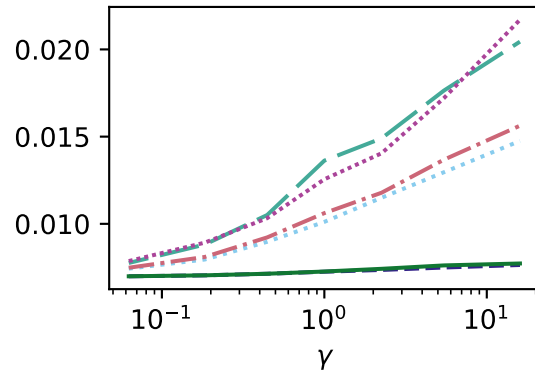Synthetic ( $n = 14$ )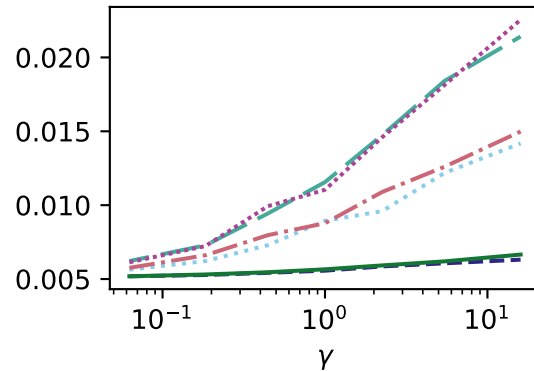Synthetic ( $n = 16$ )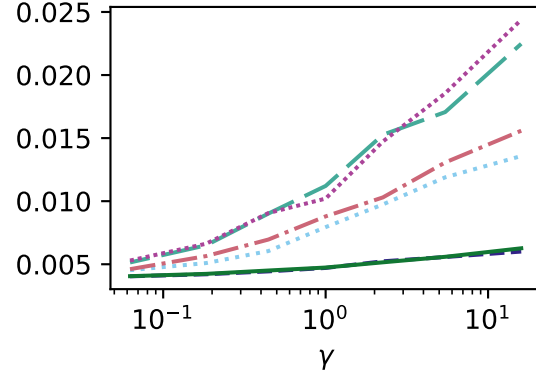

..... Kernel SHAP

- - - Optimized Kernel SHAP

— Leverage SHAP

- . - Kernel SHAP Paired

- - - Leverage SHAP wo Bernoulli

..... Leverage SHAP wo Bernoulli, Paired
