# Supplementary material
Source: ML conference proceedings conference paper supplement (https://openreview.net/forum?id=wg3rBImn3O)

Synthetic ( $n = 10$ )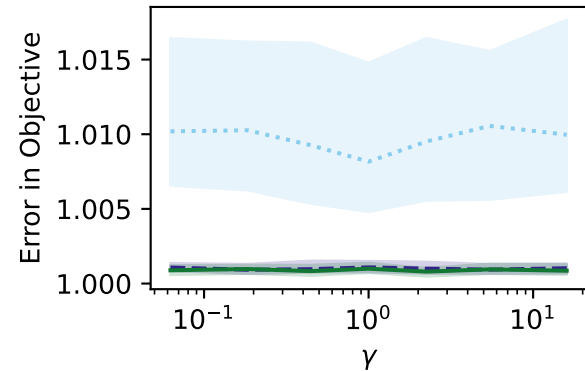Synthetic ( $n = 12$ )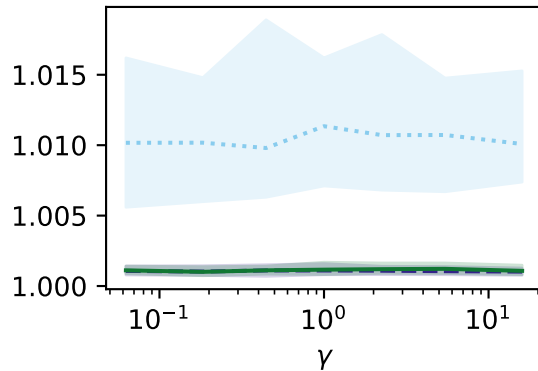Synthetic ( $n = 14$ )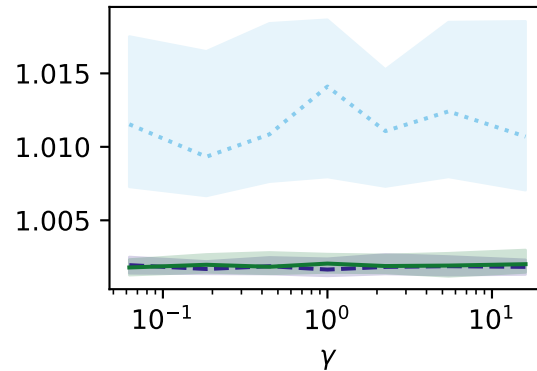Synthetic ( $n = 16$ )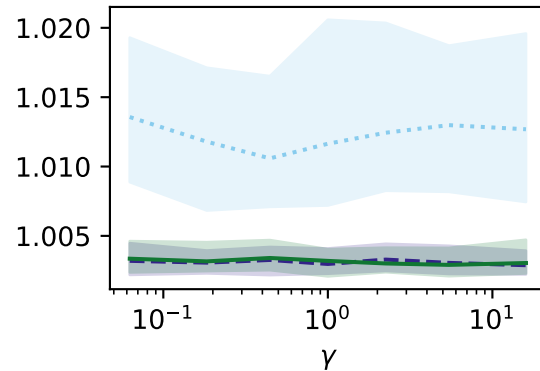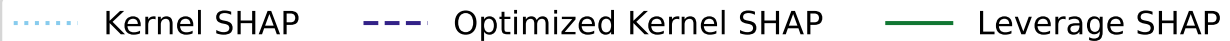

Supplement: supplementary_material [file attachment]

Kernel SHAP

Optimized Kernel SHAP

Leverage SHAP

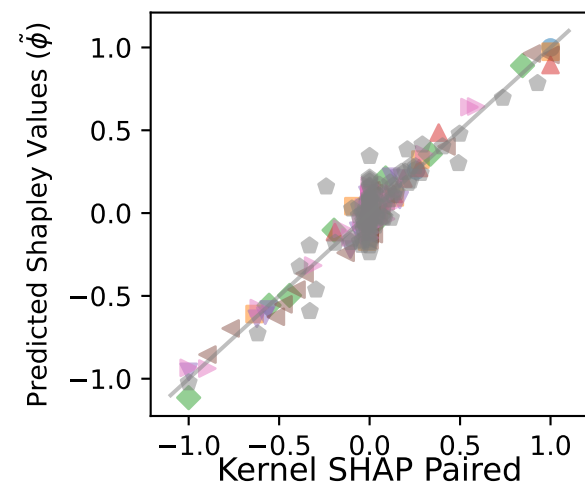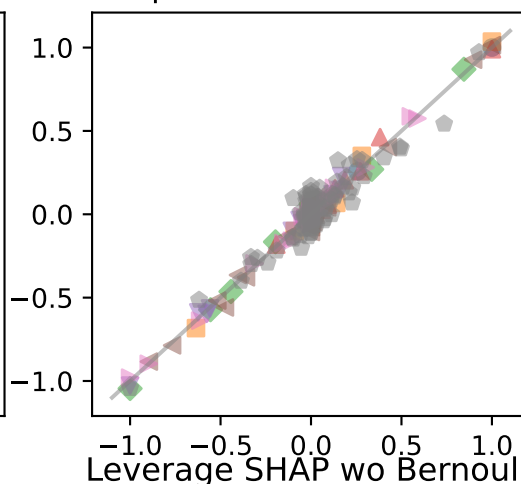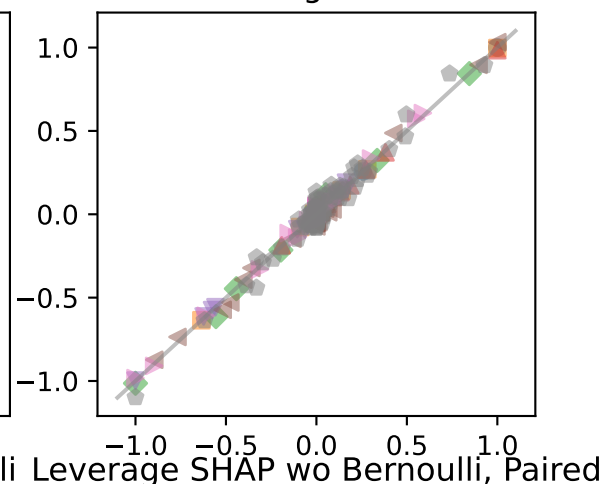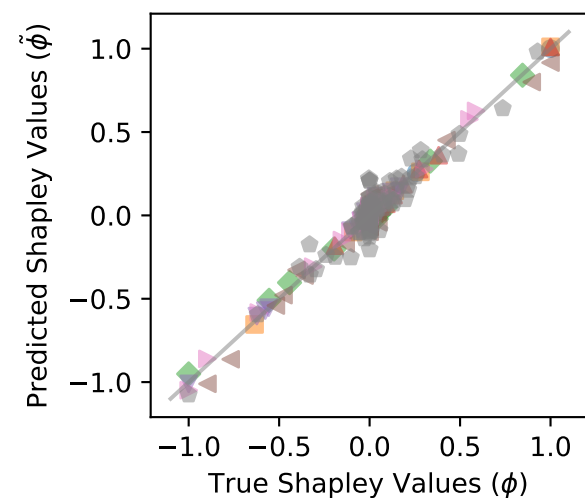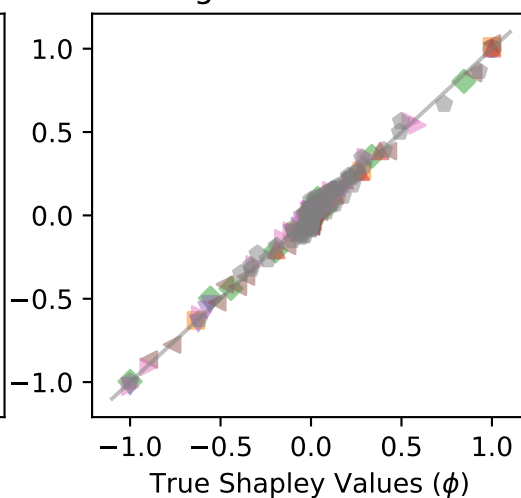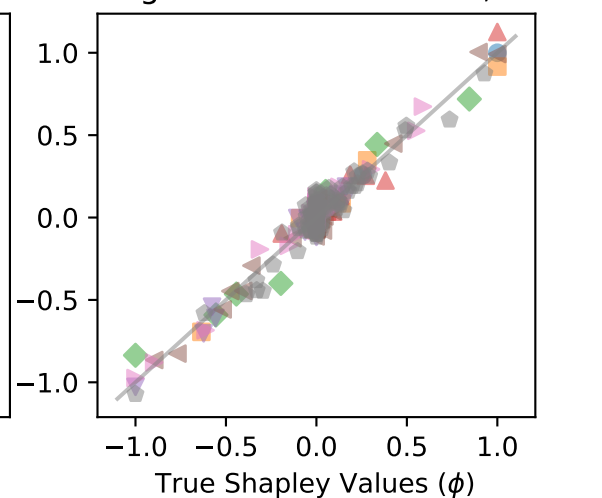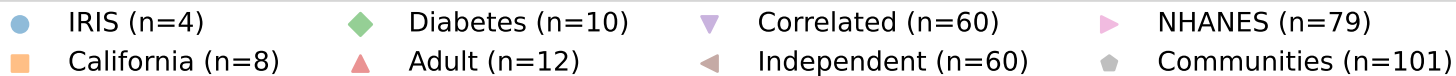

Supplement: supplementary_material [file attachment]

IRIS ( $n = 4$ )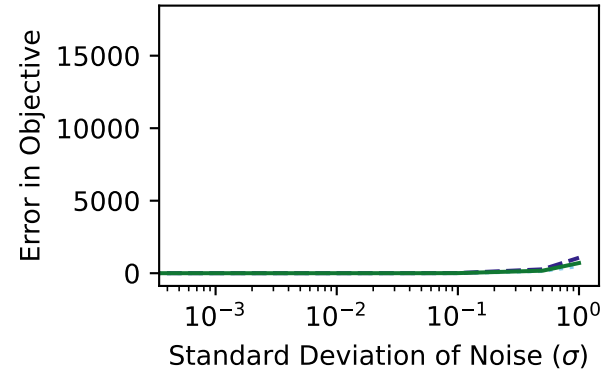California ( $n = 8$ )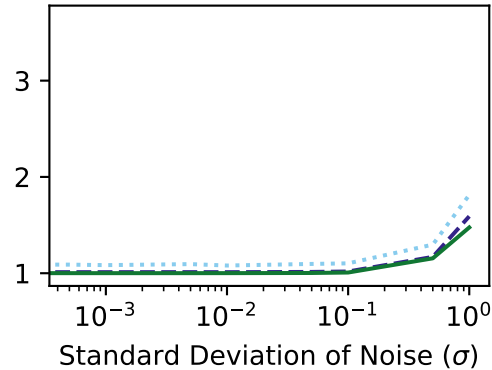Diabetes ( $n = 10$ )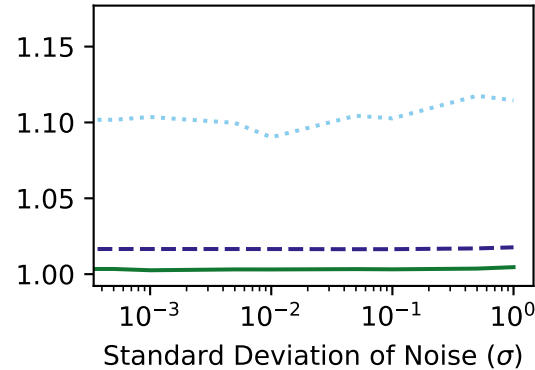Adult ( $n = 12$ )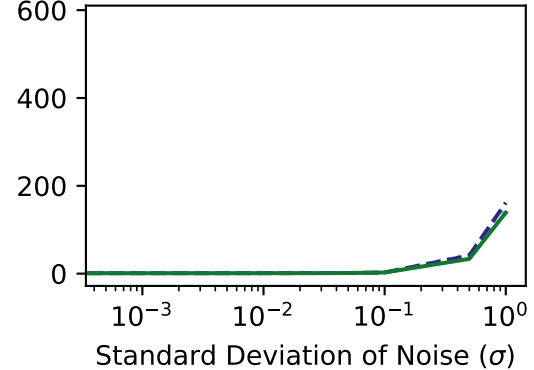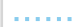

Kernel SHAP

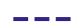

Optimized Kernel SHAP

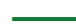

Leverage SHAP

Supplement: supplementary_material [file attachment]

IRIS ( $n = 4$ )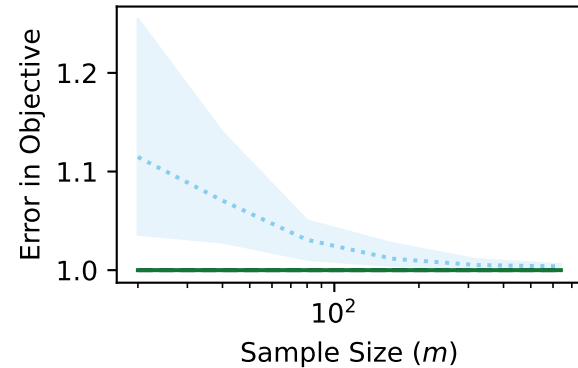California ( $n = 8$ )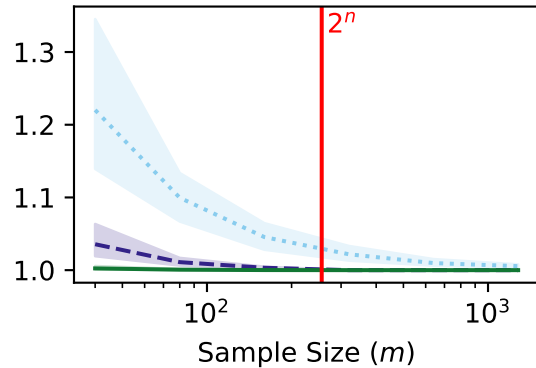Diabetes ( $n = 10$ )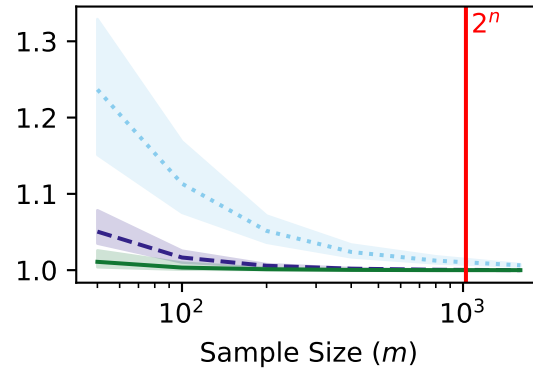Adult ( $n = 12$ )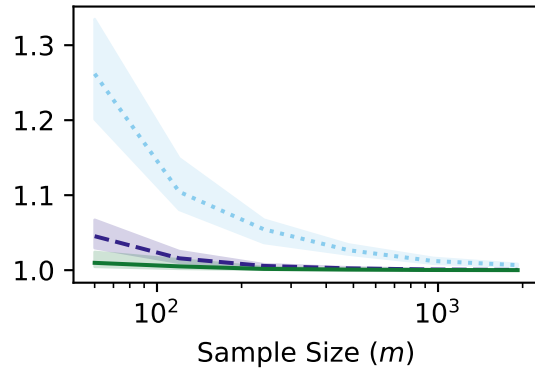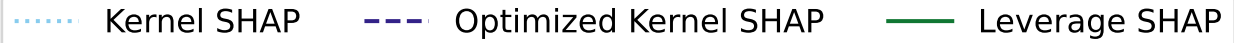

Supplement: supplementary_material [file attachment]

IRIS ( $n = 4$ )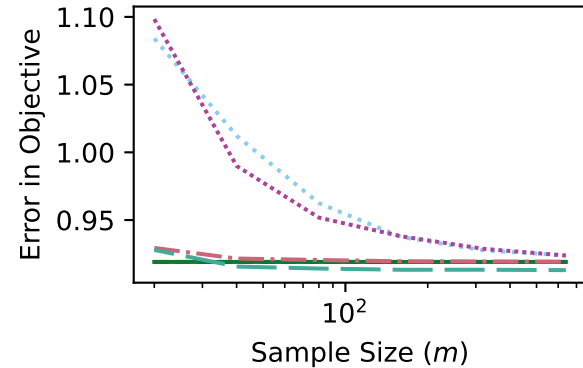California ( $n = 8$ )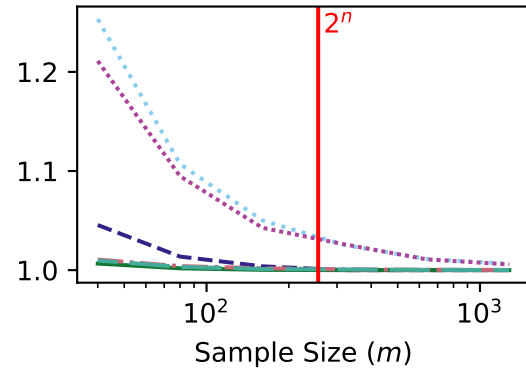Diabetes ( $n = 10$ )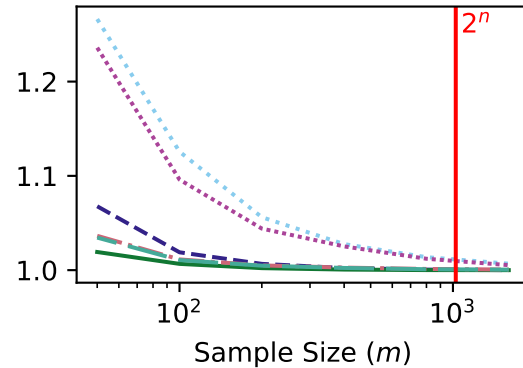Adult ( $n = 12$ )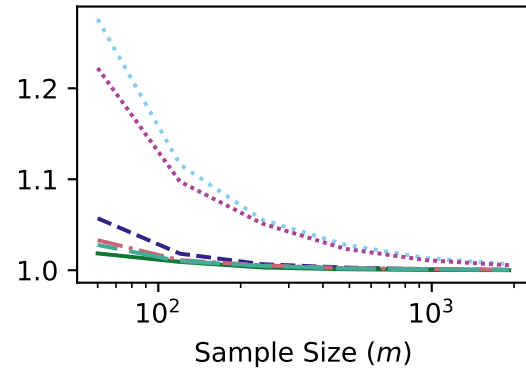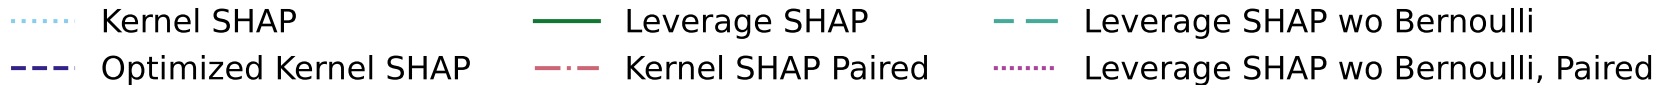

Supplement: supplementary_material [file attachment]

# Kernel SHAP and Leverage SHAP Probability Distributions

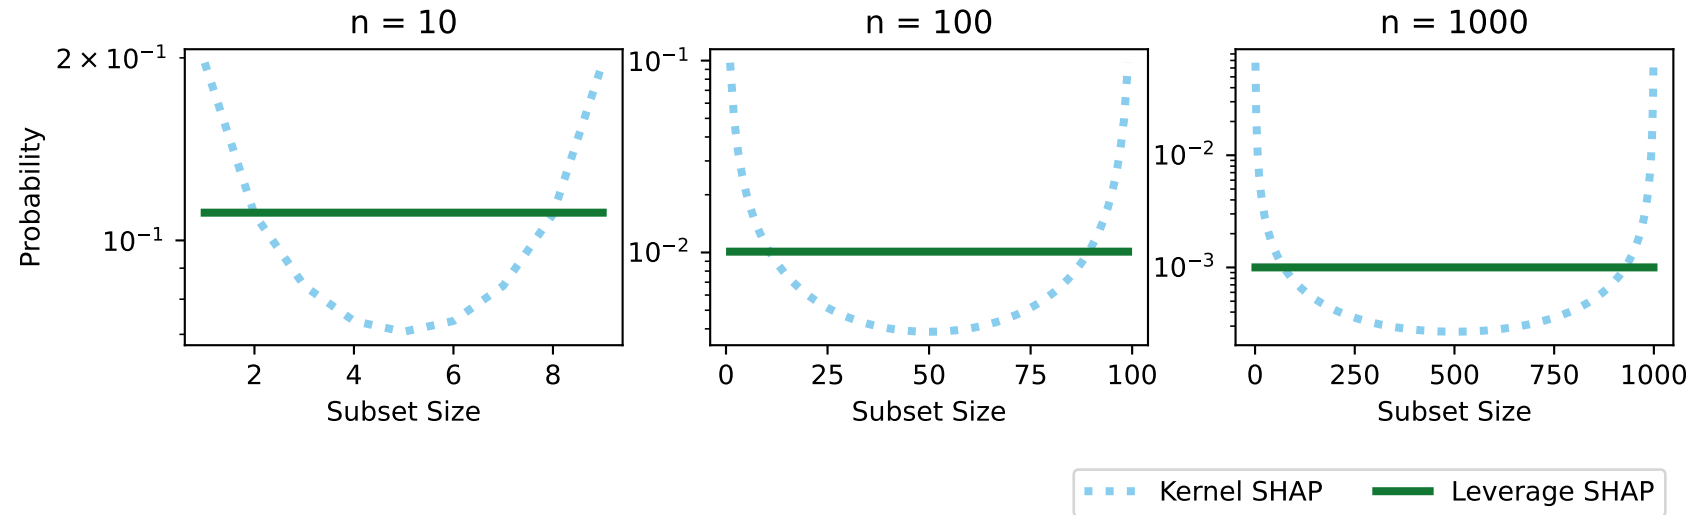

Supplement: supplementary_material [file attachment]

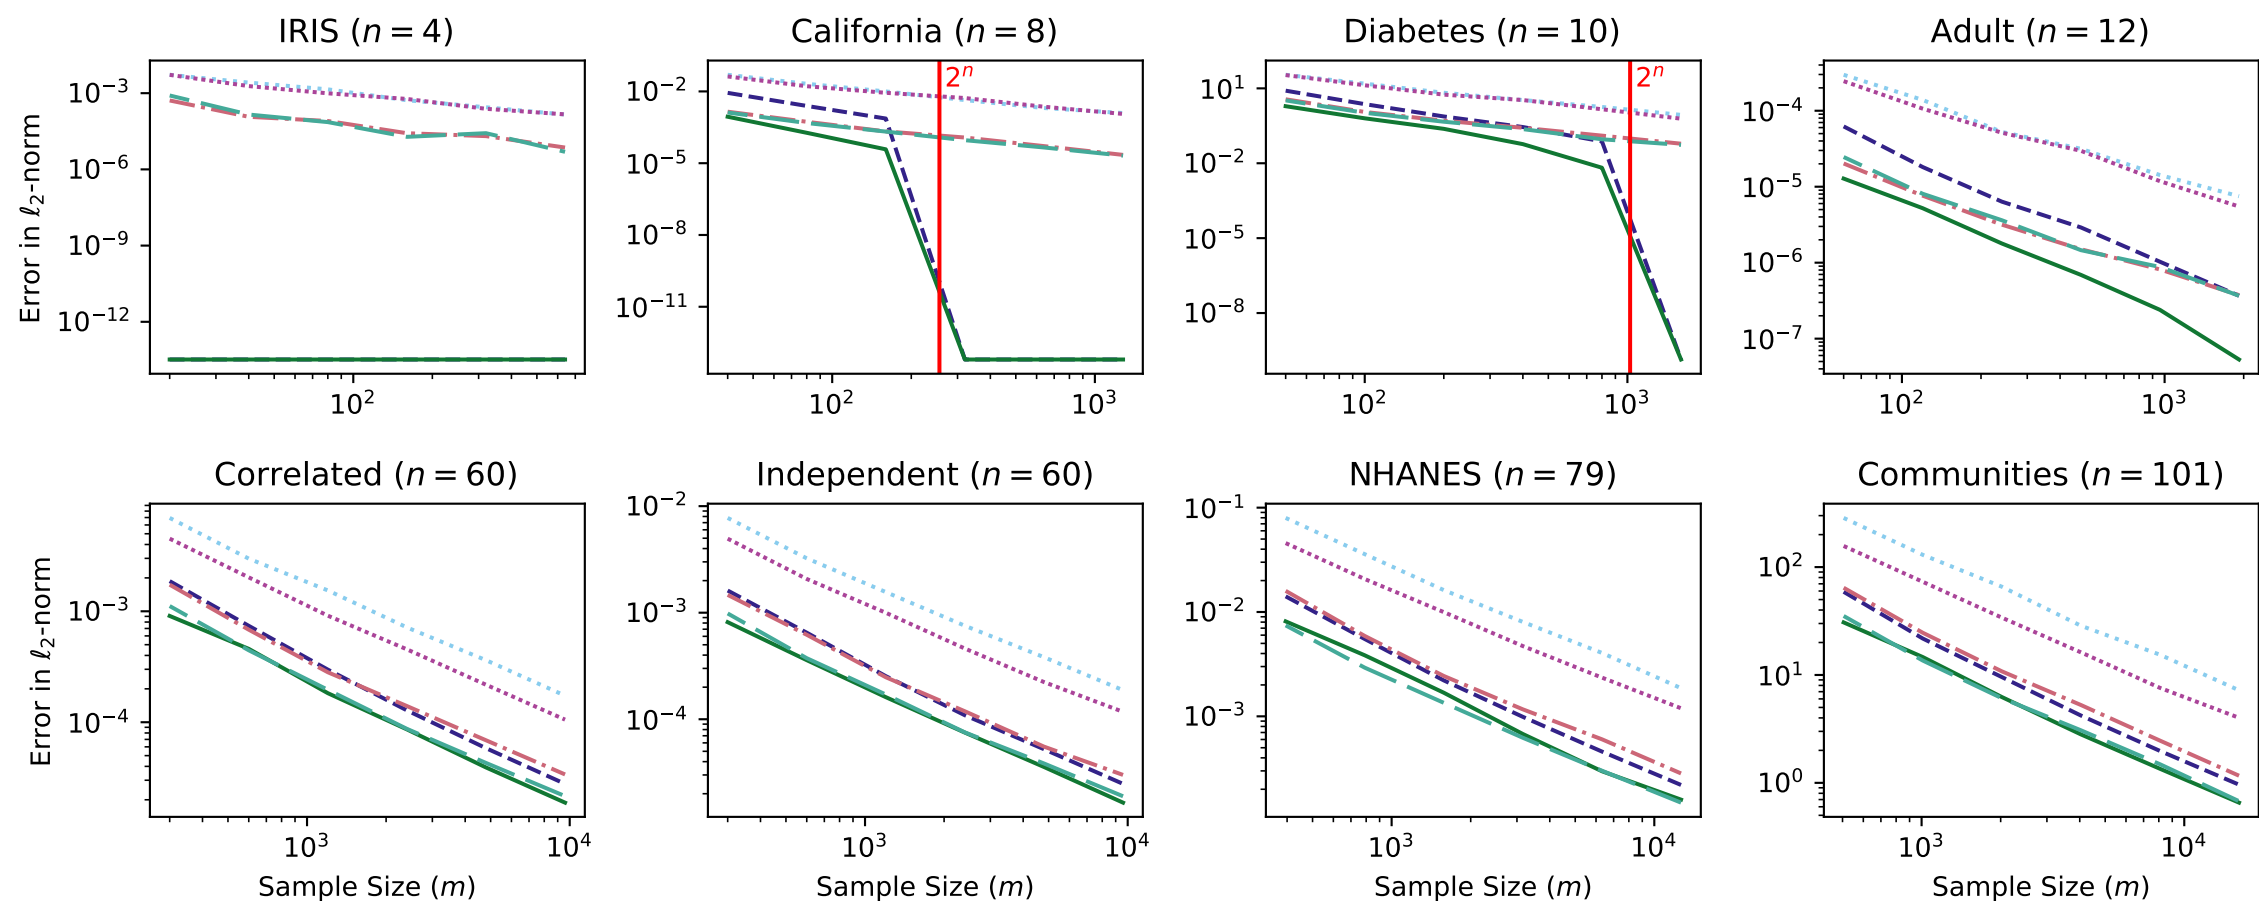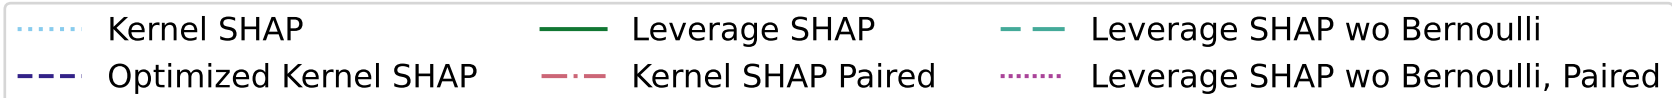

Supplement: supplementary_material [file attachment]

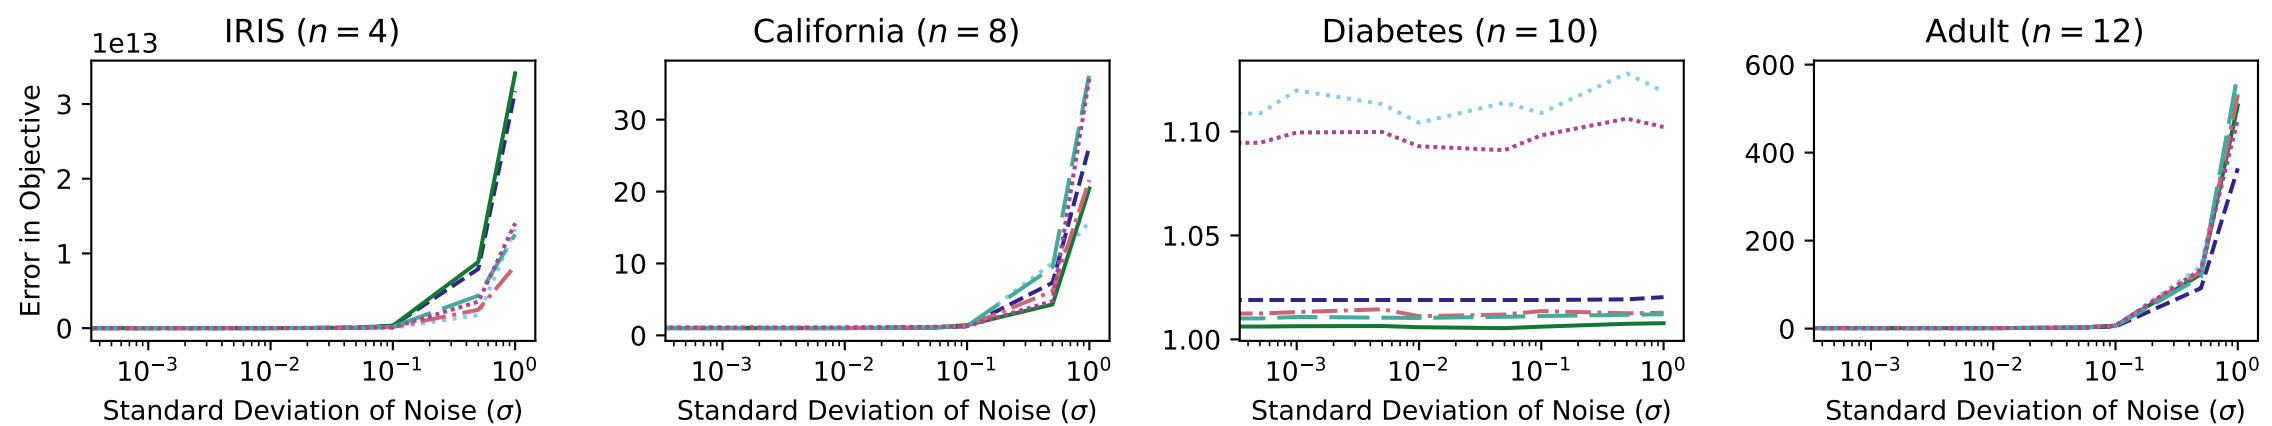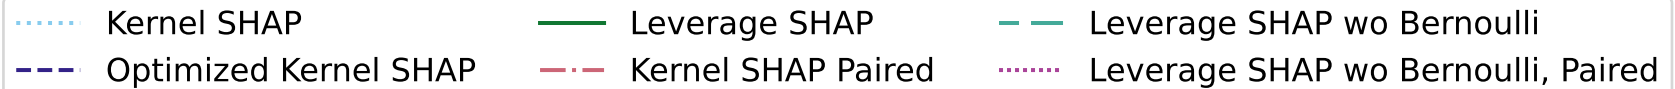

Supplement: supplementary_material [file attachment]

IRIS ( $n = 4$ )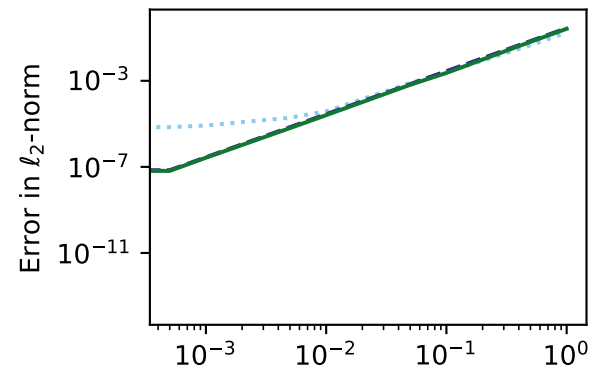California ( $n = 8$ )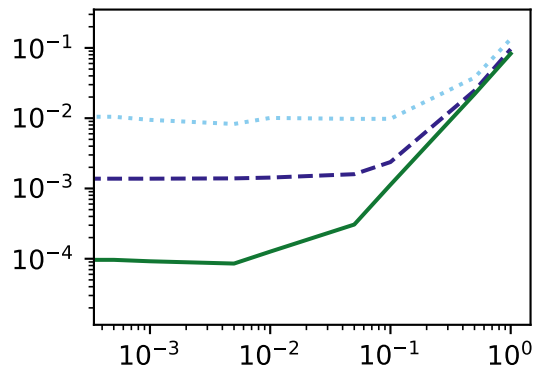Diabetes ( $n = 10$ )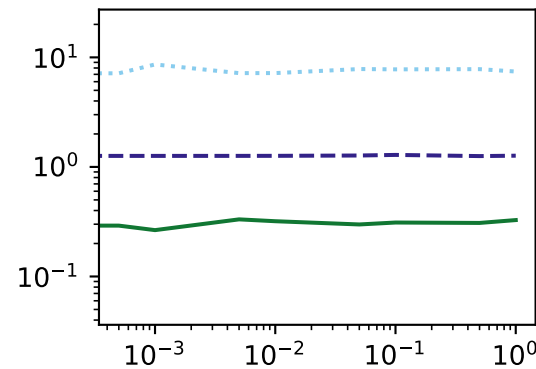Adult ( $n = 12$ )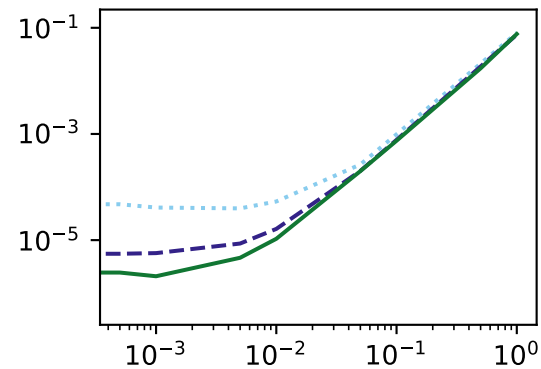Correlated ( $n = 60$ )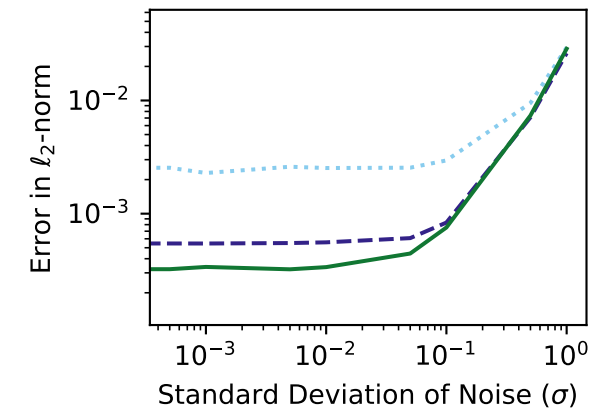Independent ( $n = 60$ )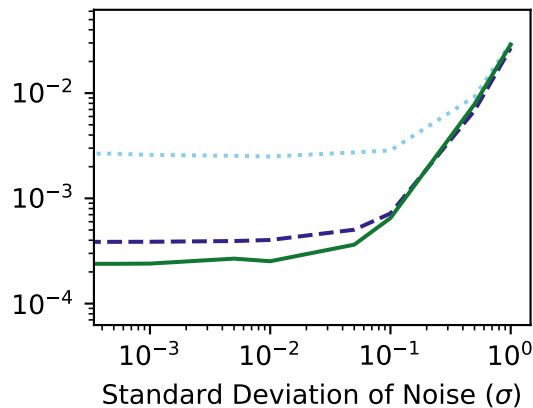NHANES ( $n = 79$ )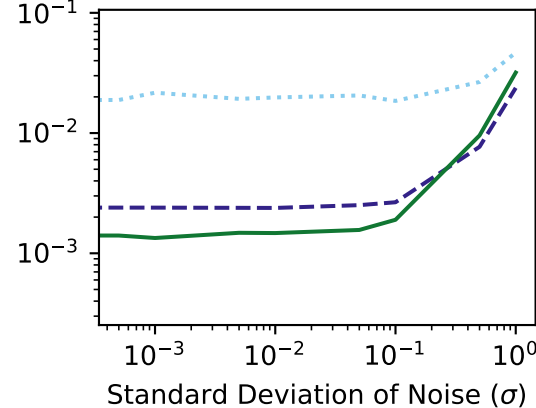Communities ( $n = 101$ )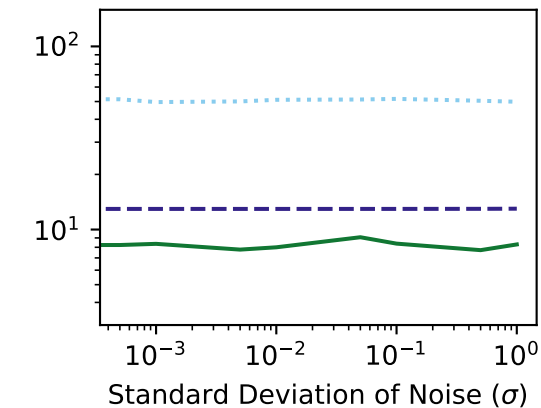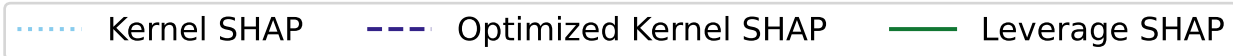

Supplement: supplementary_material [file attachment]

IRIS ( $n = 4$ )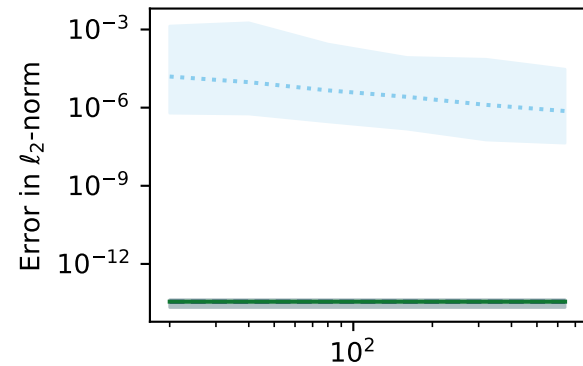California ( $n = 8$ )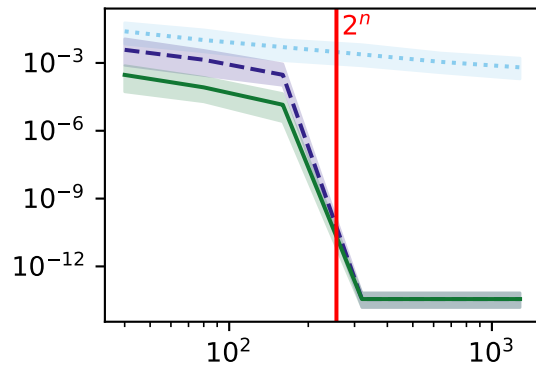Diabetes ( $n = 10$ )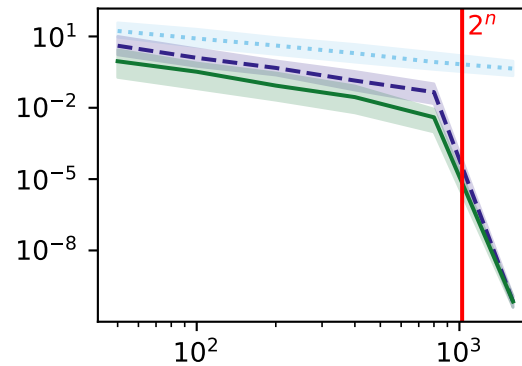Adult ( $n = 12$ )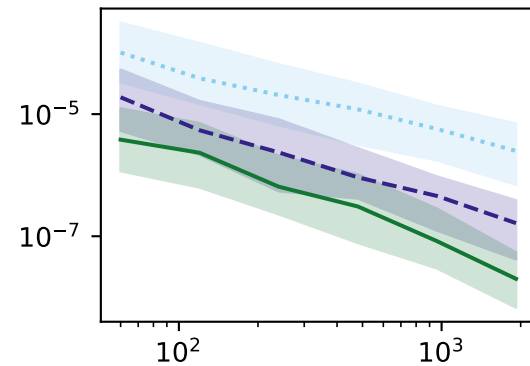Correlated ( $n = 60$ )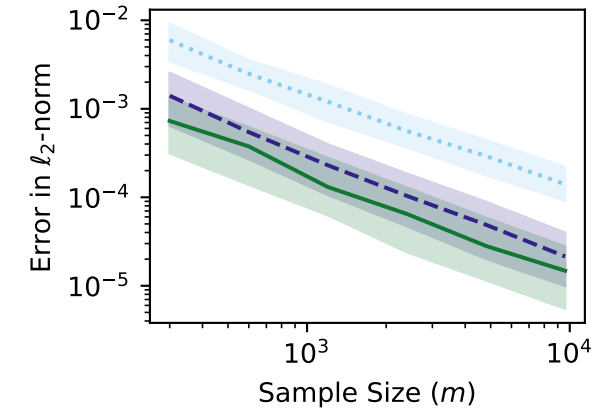Independent ( $n = 60$ )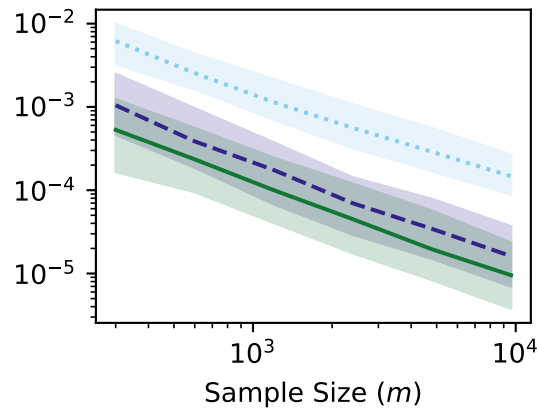NHANES ( $n = 79$ )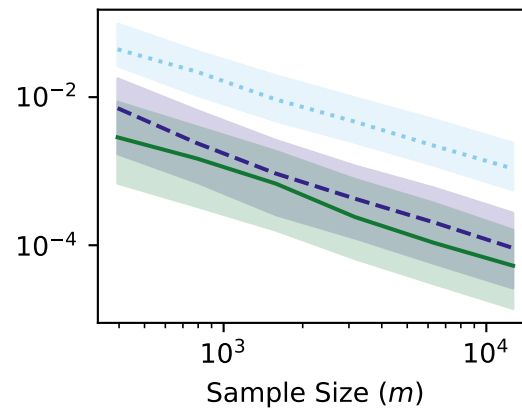Communities ( $n = 101$ )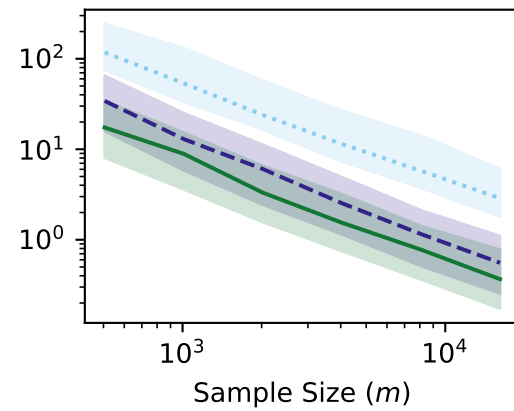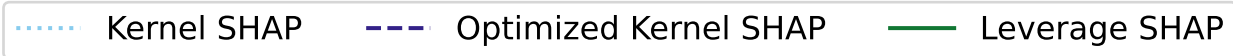

Supplement: supplementary_material [file attachment]

IRIS ( $n = 4$ )California ( $n = 8$ )Diabetes ( $n = 10$ )Adult ( $n = 12$ )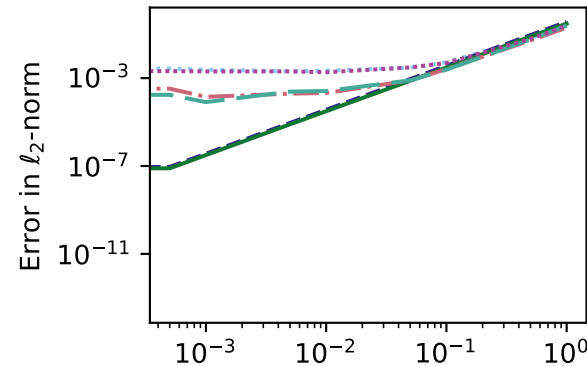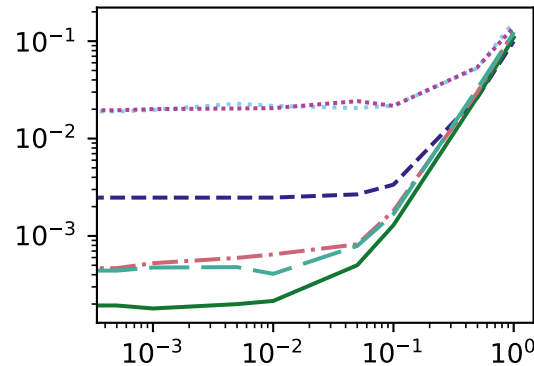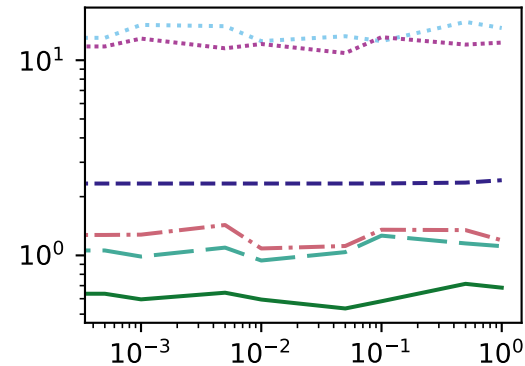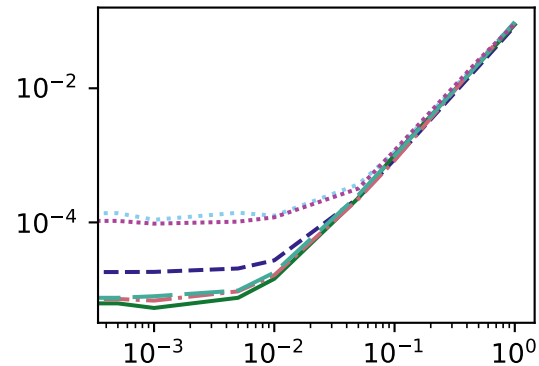Correlated ( $n = 60$ )Independent ( $n = 60$ )NHANES ( $n = 79$ )Communities ( $n = 101$ )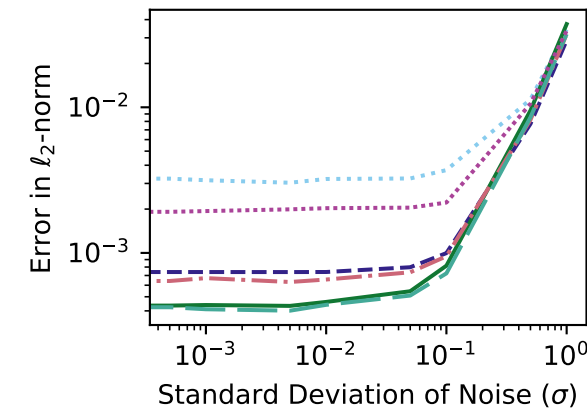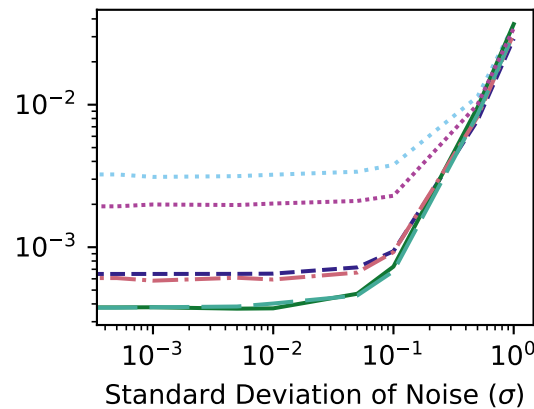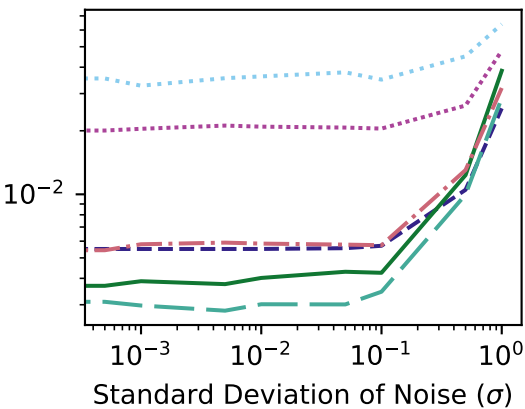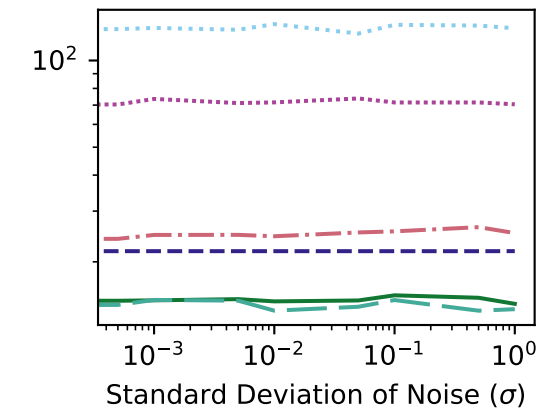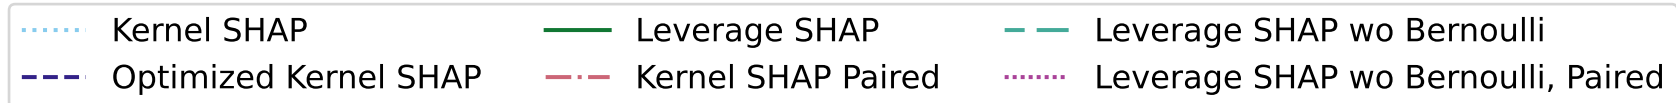

Supplement: supplementary_material [file attachment]

Kernel SHAP

Optimized Kernel SHAP

Leverage SHAP

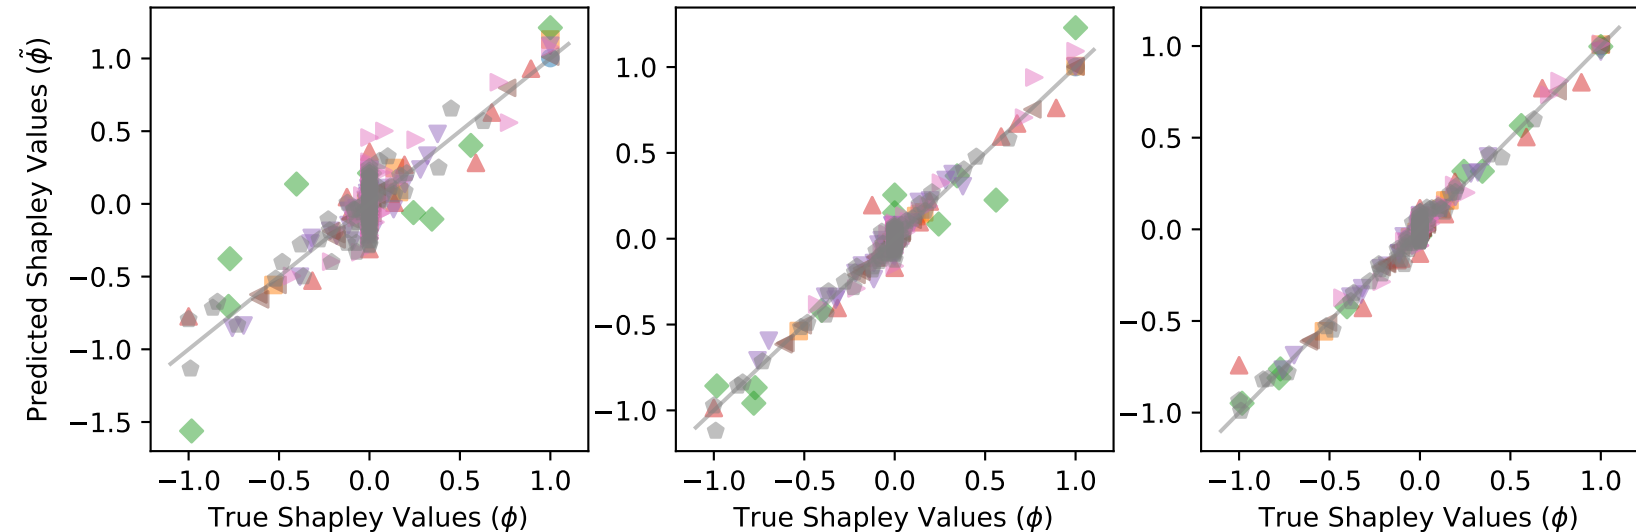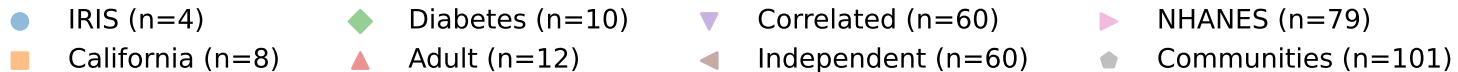

Supplement: supplementary_material [file attachment]
